# Supplementary material for: Efficacy and safety of filgotinib in patients with rheumatoid arthritis: week 156 interim results from a long-term extension study
Source: PubMed Central journal article supplement (PMC11529685; doi:10.1136/rmdopen-2024-004476), 2024-10-24
Supplement: rmdopen-10-4-s002.pdf [file rmdopen-10-4-s002.pdf]

# Efficacy and safety of filgotinib in patients with rheumatoid arthritis: Week 156 interim results from a long-term extension study

**FINCH 4** is an ongoing long-term extension study of filgotinib in patients with RA. The primary outcome is safety and tolerability; the secondary outcome is efficacy

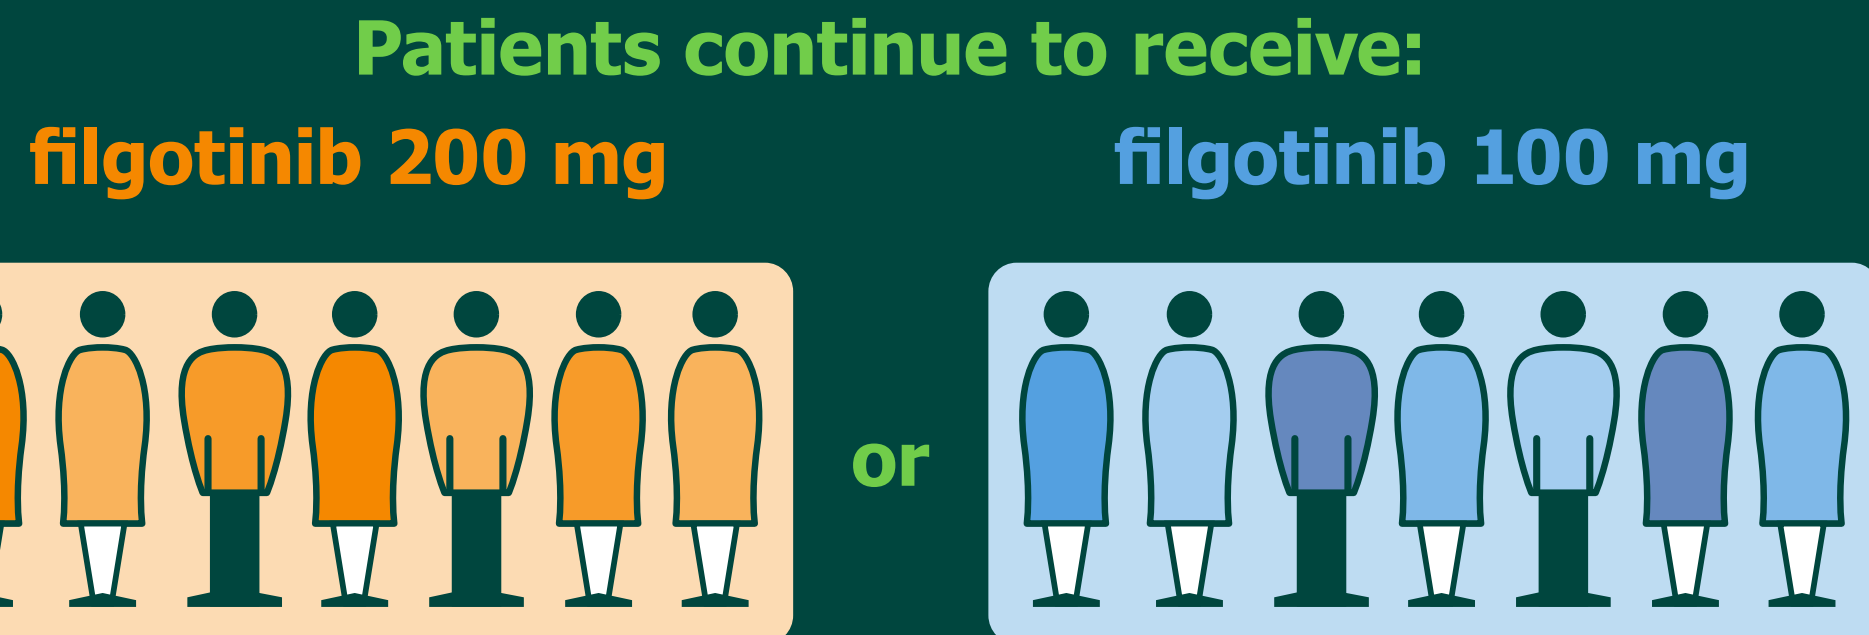

from the parent study (FINCH 1, 2 and 3) or receive filgotinib 200 mg or 100 mg de novo

## Key findings

In patients with an inadequate response to methotrexate (from FINCH 1)

### Proportion of responders following filgotinib treatment at week 156 (NRI analysis)

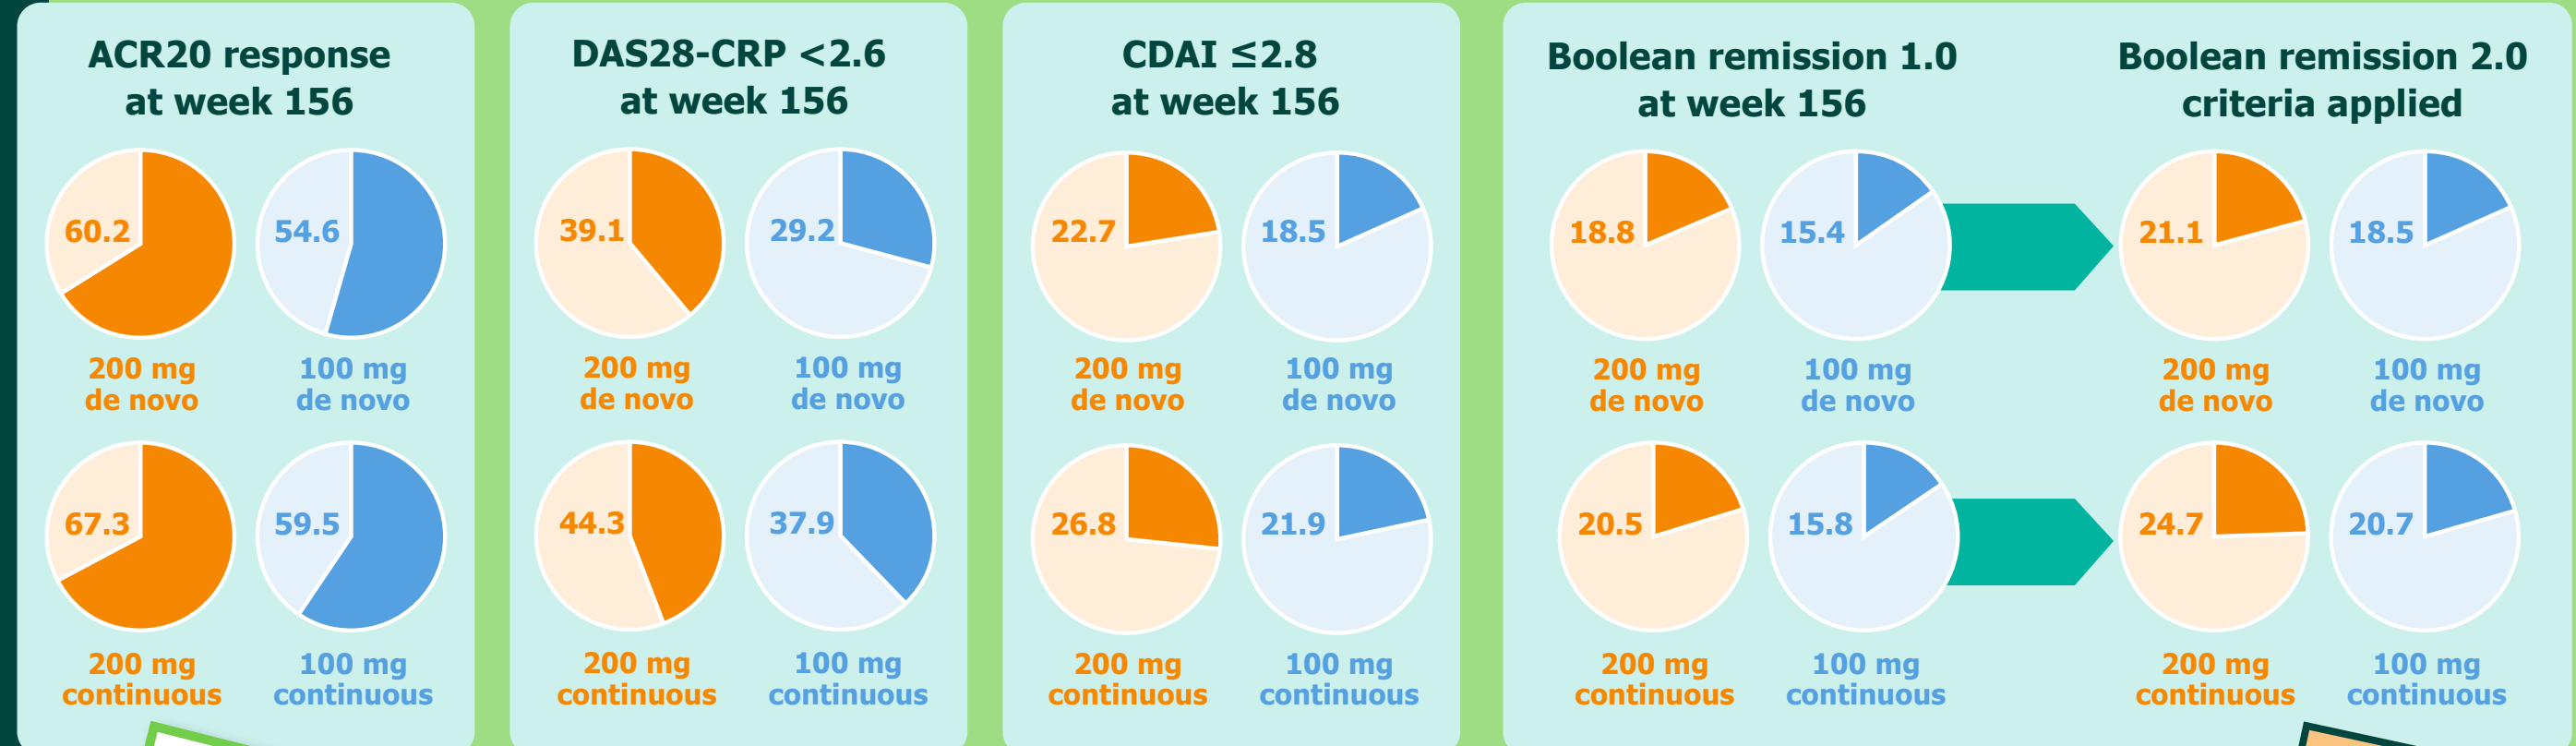

Similar efficacy data were seen for methotrexate naïve patients (from FINCH 3) and patients with an inadequate response to bDMARDs (from FINCH 2)

**No unexpected safety signals were observed**

In filgotinib 200 mg and 100 mg groups, respectively:

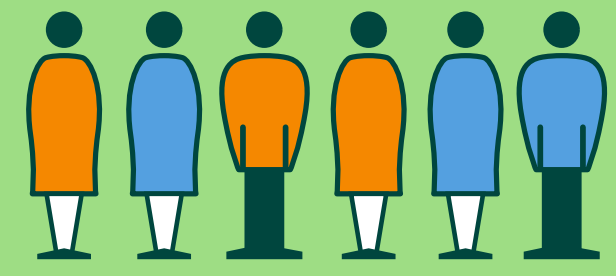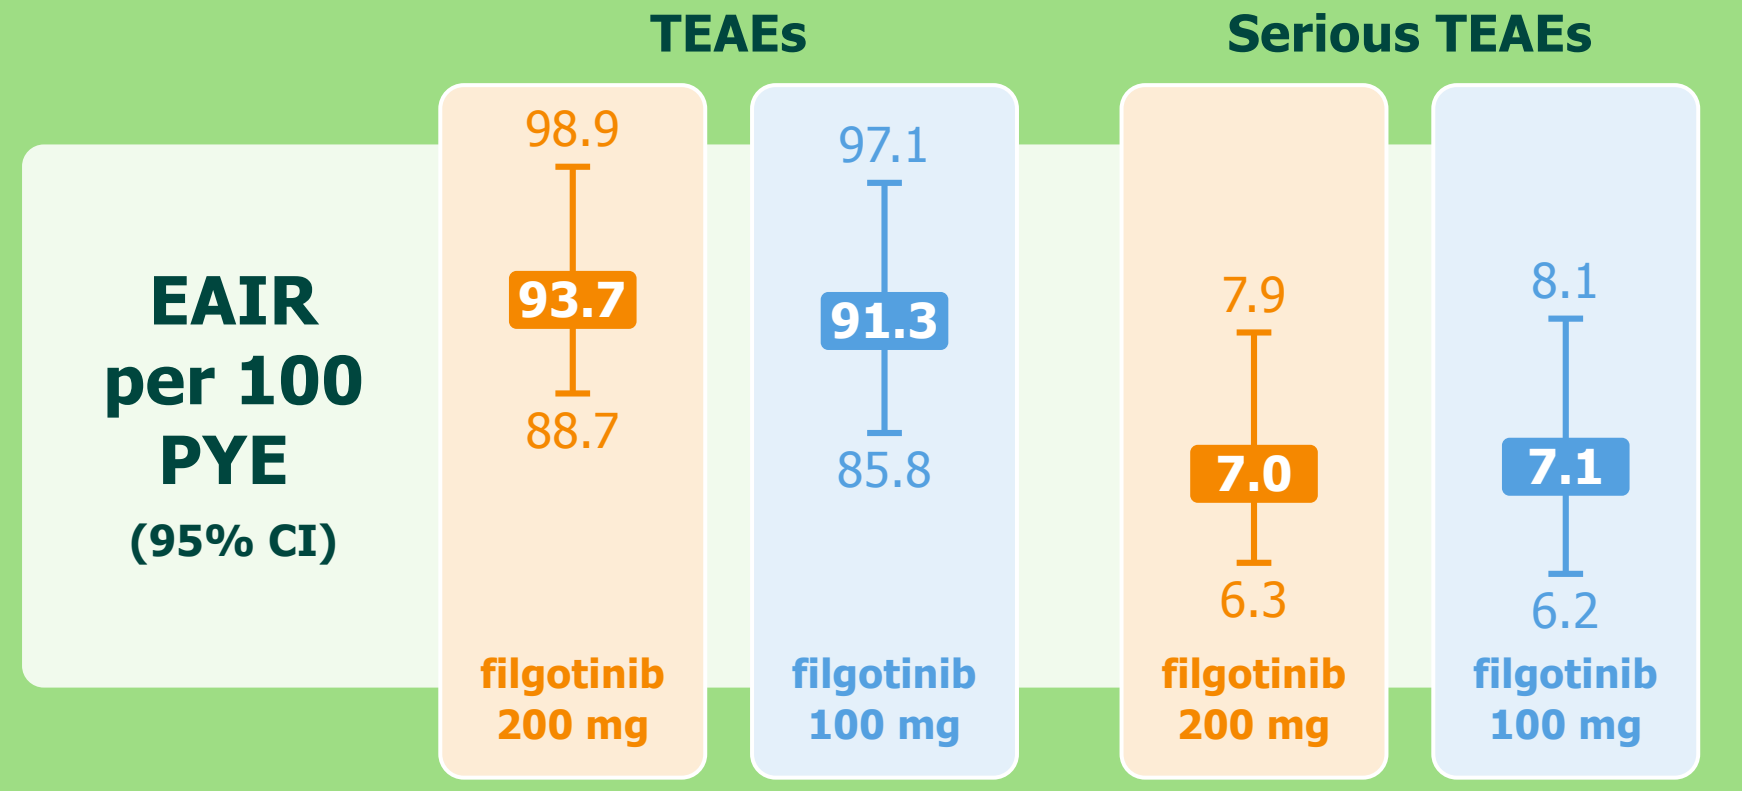

## Conclusion

filgotinib 200 and 100 mg demonstrated sustained efficacy up to week 156 in FINCH 4, in patients enrolled from with no unexpected safety signals **FINCH 1 2 or 3**

ACR20, American College of Rheumatology 20; bDMARD, biologic disease-modifying anti-rheumatic drug; CDAI, Clinical Disease Activity Index; CI, confidence interval; DAS28-CRP, Disease Activity Score 28 using C-reactive protein; EAIR, exposure-adjusted incident rate; NRI, non-responder imputation; PYE, patient-years of exposure; RA, rheumatoid arthritis; TEAE, treatment-emergent adverse event
